# Supplementary material for: N-Heterocyclic Carbene Copper (I) Complexes Incorporating Pyrene Chromophore: Synthesis, Crystal Structure, and Luminescent Properties
Source: MDPI journal article supplement (doi:10.3390/molecules28104025), 2023-05-11
Supplement: s1 [file s1]

## *Supporting Information*

# **N-Heterocyclic Carbene Copper (I) Complexes Incorporating Pyrene Chromophore: Synthesis, Crystal Structure, and Luminescent Properties**

Yaping Cheng <sup>1</sup>, Geoffrey Gontard <sup>1</sup>, Abderrahim Khatyr <sup>2</sup>, Michael Knorr <sup>2</sup> and Hani Amouri <sup>1,\*</sup>

<sup>1</sup> Institut Parisien de Chimie Moléculaire (IPCM), UMR CNRS 8232, Sorbonne Université-Campus Pierre et Marie Curie, 4 Place Jussieu, CEDEX 05, 75252 Paris, France;

yaping.cheng@sorbonne-universite.fr (Y.C.); geoffrey.gontard@sorbonne-universite.fr (G.G.)

<sup>2</sup> Institut UTINAM, UMR CNRS 6213, Université de Franche-Comté, 16 Route de Gray, 25030 Besançon, France; abderrahim.khatyr@univ-fcomte.fr (A.K.); michael.knorr@univ-fcomte.fr (M.K.)

\* Correspondence: hani.amouri@sorbonne-universite.fr

## **TABLE OF CONTENTS**

|                        |                                                                                                                            |
|------------------------|----------------------------------------------------------------------------------------------------------------------------|
| <b>Figures S1–S10</b>  | ( <sup>1</sup> H, <sup>13</sup> C) -NMR spectra of compounds ( <b>1</b> , <b>2a</b> , <b>2b</b> , <b>3</b> and <b>4</b> ). |
| <b>Figure S11</b>      | Normalized emission spectra of ligand <b>1</b> and complexes <b>3-4</b> in solid-state at rt.                              |
| <b>Figures S12–S14</b> | Emission decay of compounds <b>1</b> , <b>3</b> and <b>4</b> in CH <sub>2</sub> Cl <sub>2</sub> at rt.                     |
| <b>Figures S15–S17</b> | Emission decay of compounds <b>1</b> , <b>3</b> and <b>4</b> in solid-state at rt.                                         |

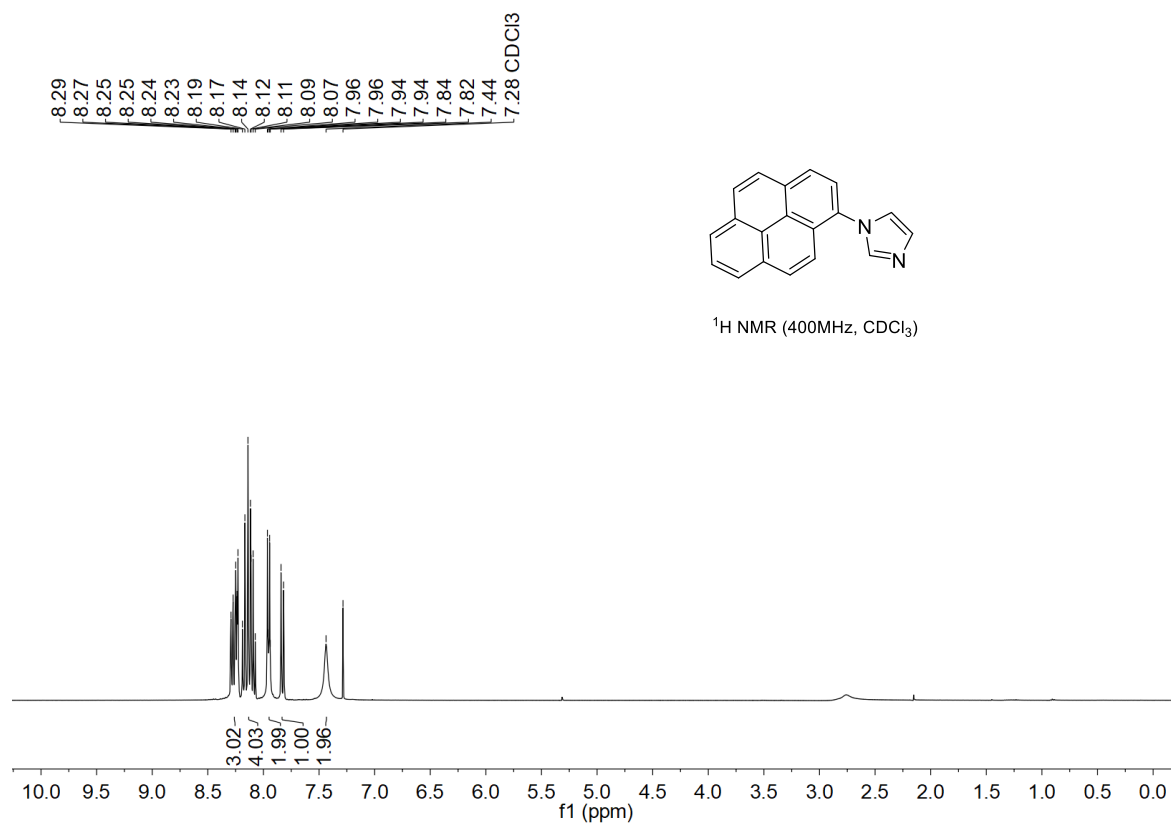

**Figure S1.** <sup>1</sup>H NMR of compound **1** in CDCl<sub>3</sub>

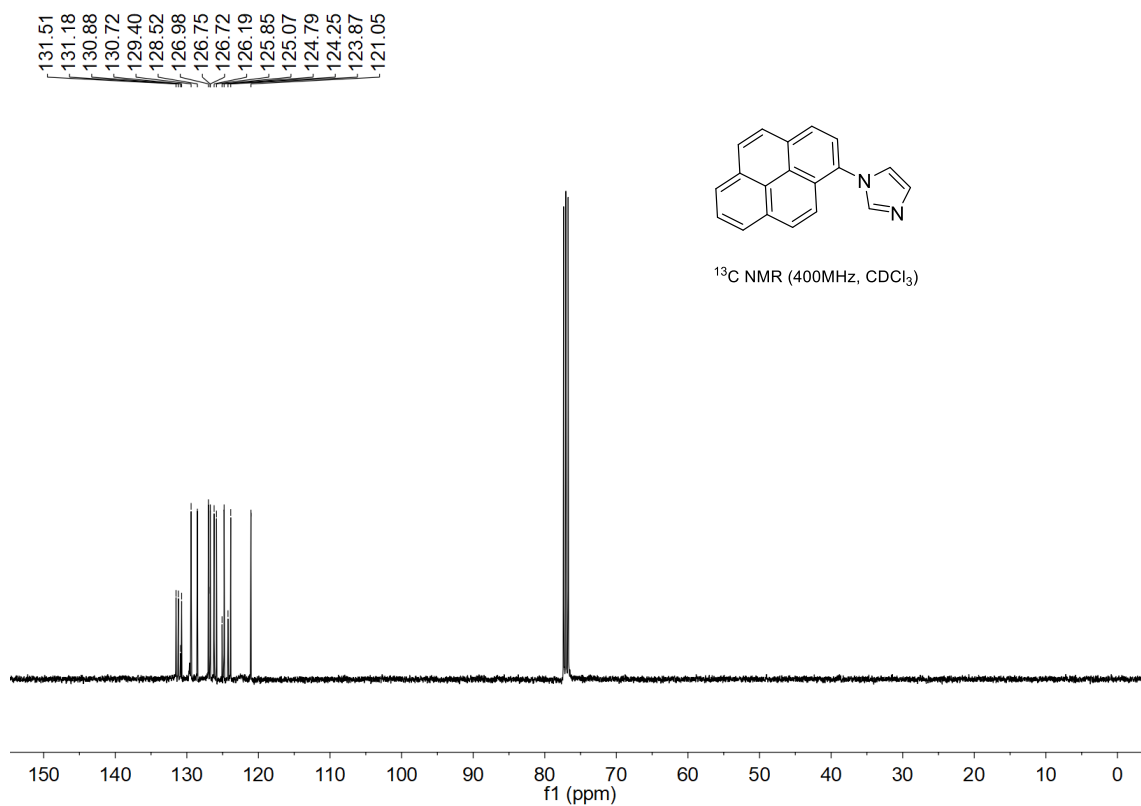

**Figure S2.** <sup>13</sup>C NMR of compound **1** in CDCl<sub>3</sub>

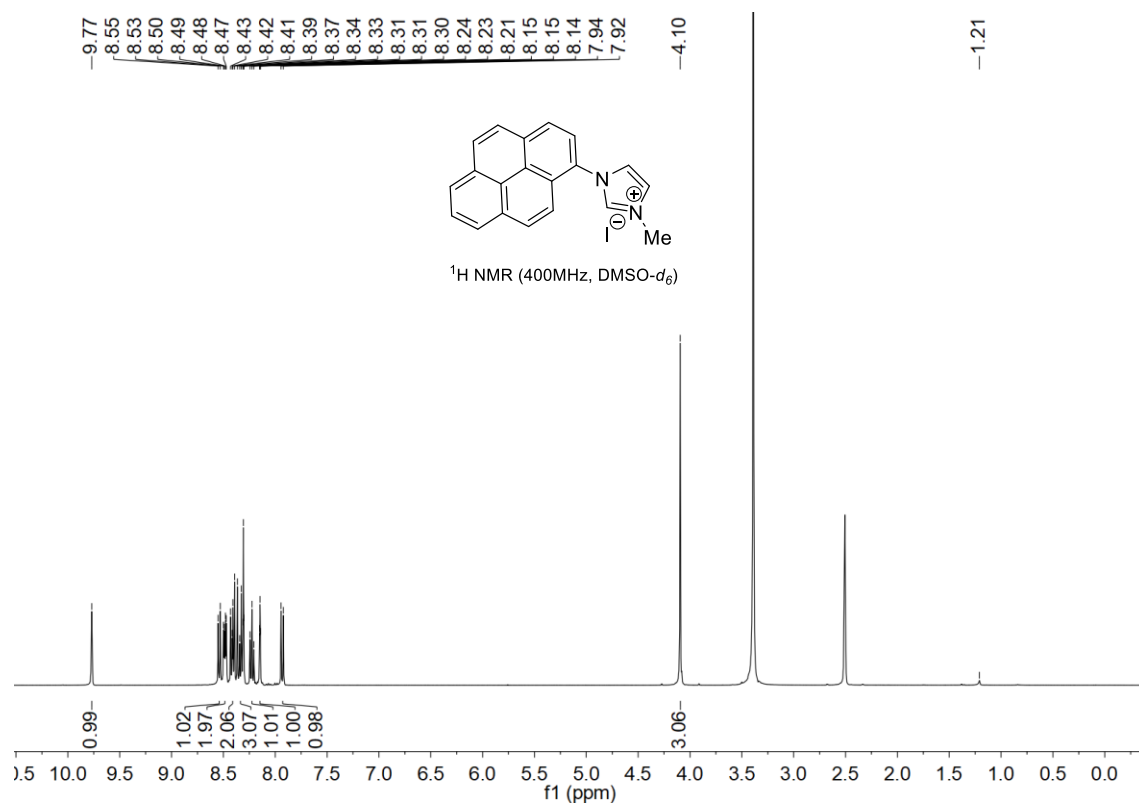

**Figure S3.** <sup>1</sup>H NMR of compound 2a in DMSO

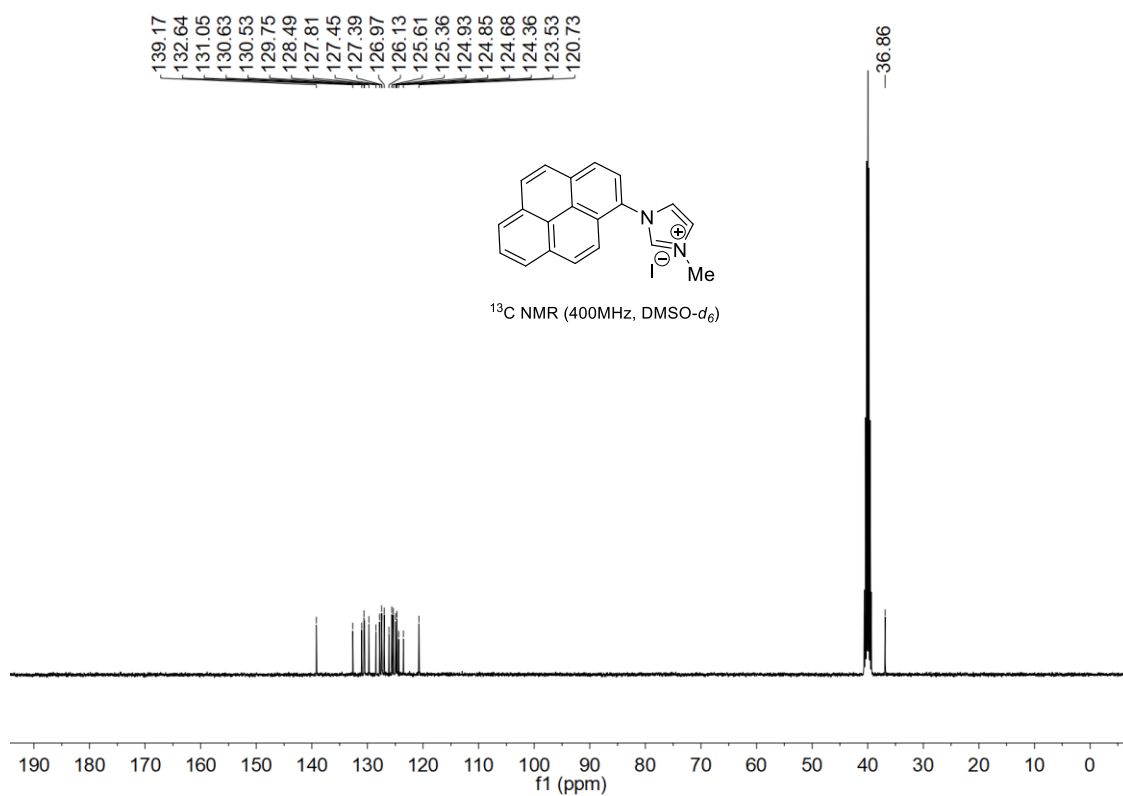

**Figure S4.** <sup>13</sup>C NMR of compound 2a in DMSO

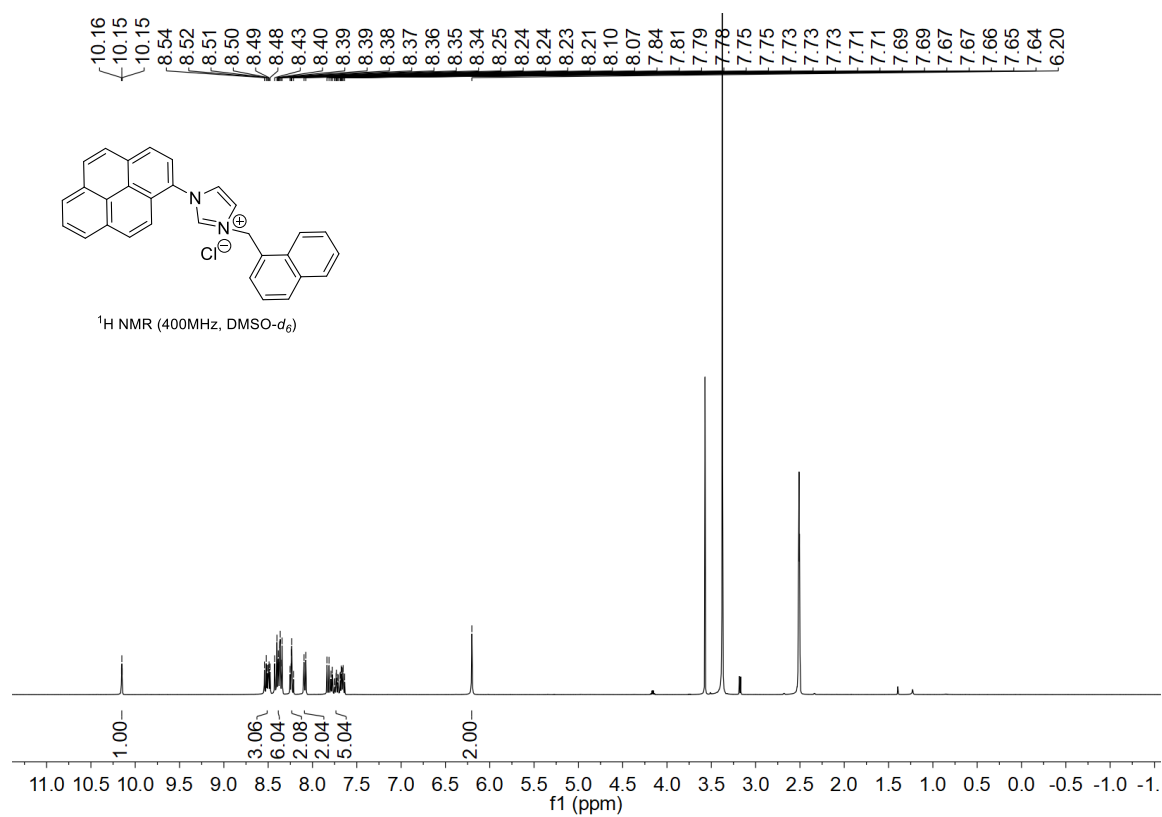

**Figure S5.** <sup>1</sup>H NMR of compound **2b** in DMSO

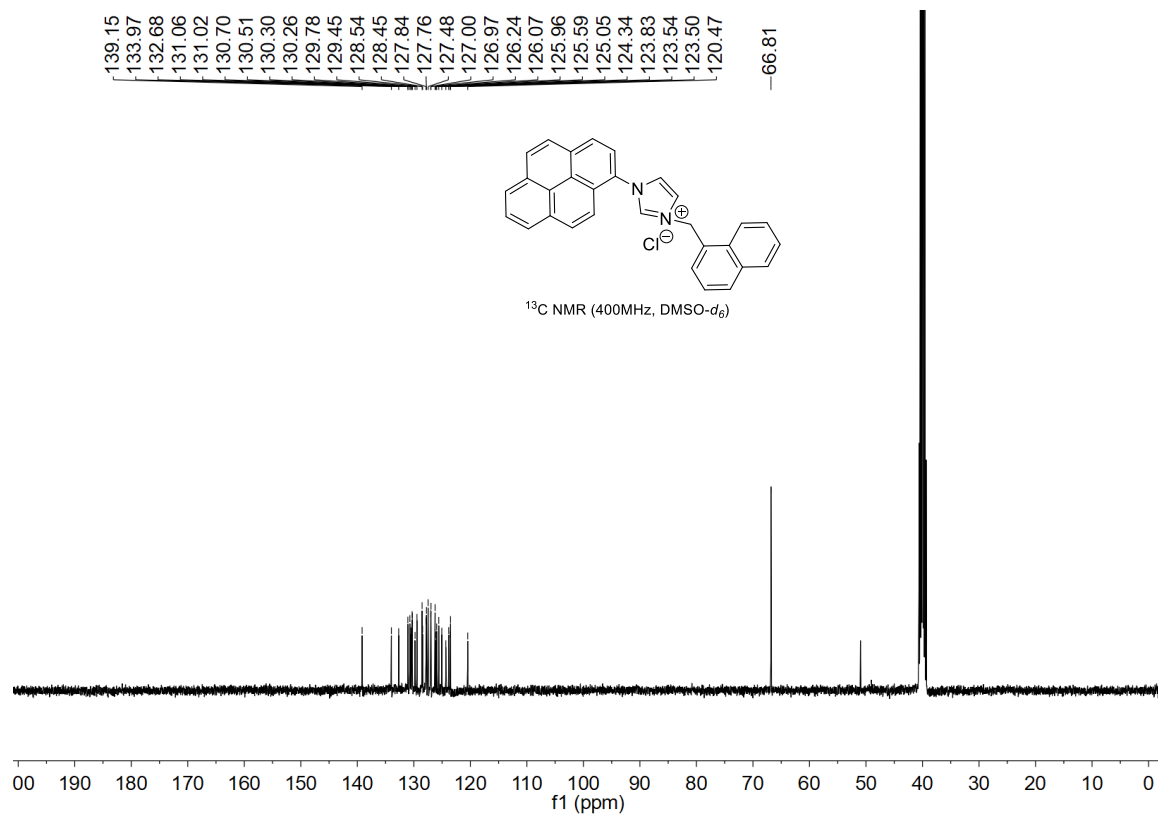

**Figure S6.** <sup>13</sup>C NMR of compound **2b** in DMSO

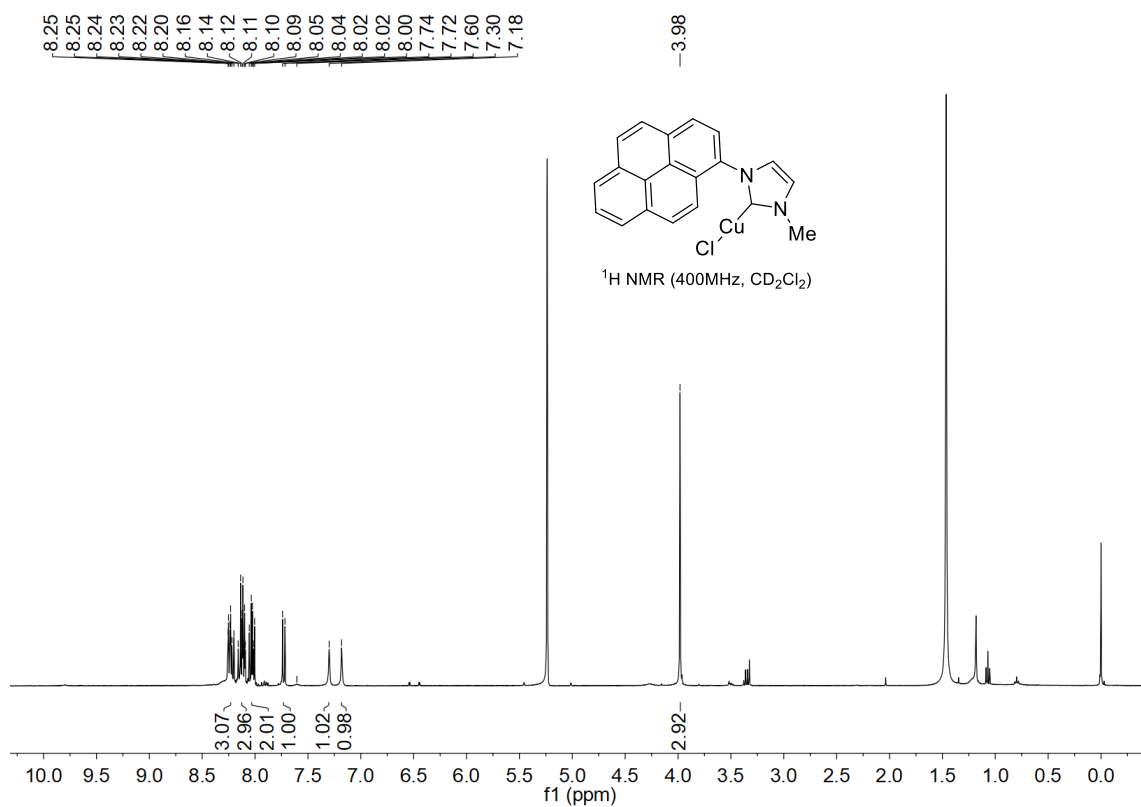

**Figure S7.**  $^1\text{H}$  NMR of complex 3 in  $\text{CD}_2\text{Cl}_2$

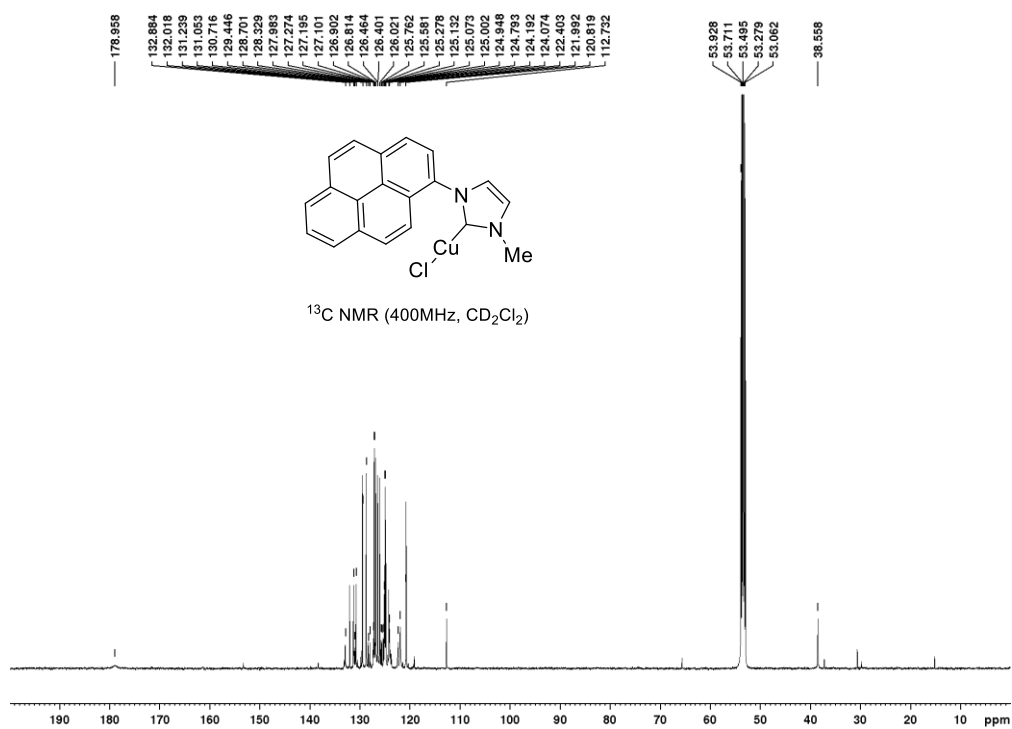

**Figure S8.**  $^{13}\text{C}$  NMR of complex 3 in  $\text{CD}_2\text{Cl}_2$

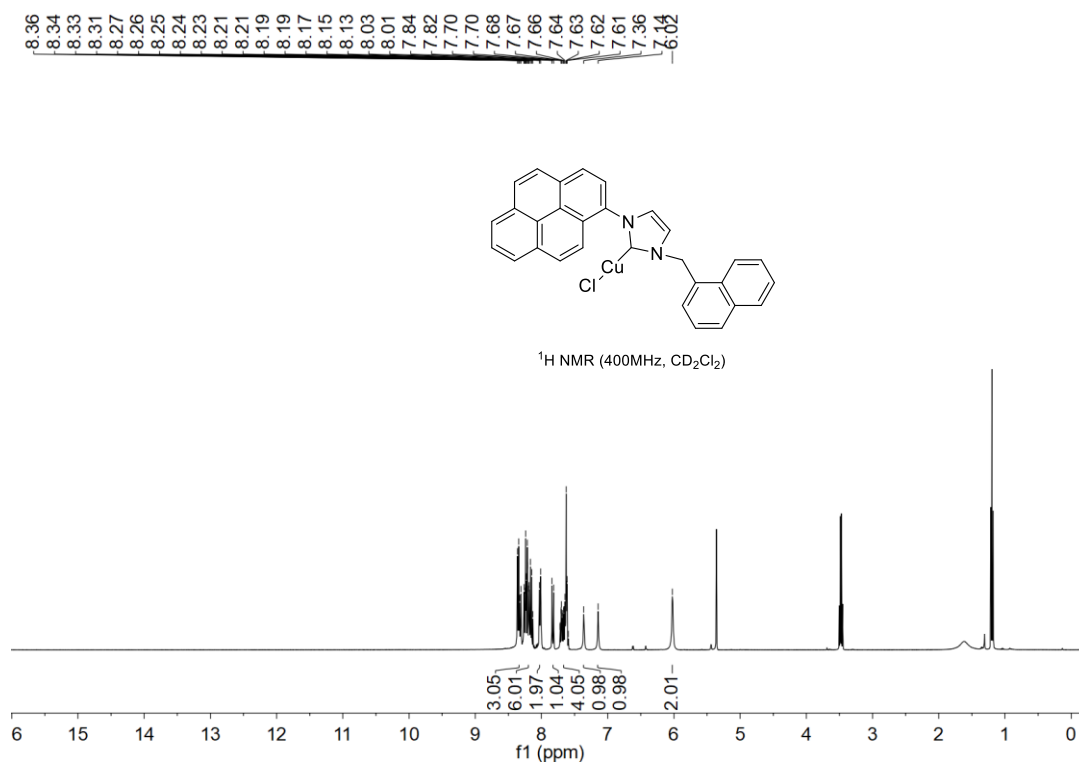

**Figure S9.** <sup>1</sup>H NMR of complex 4 in CD<sub>2</sub>Cl<sub>2</sub>

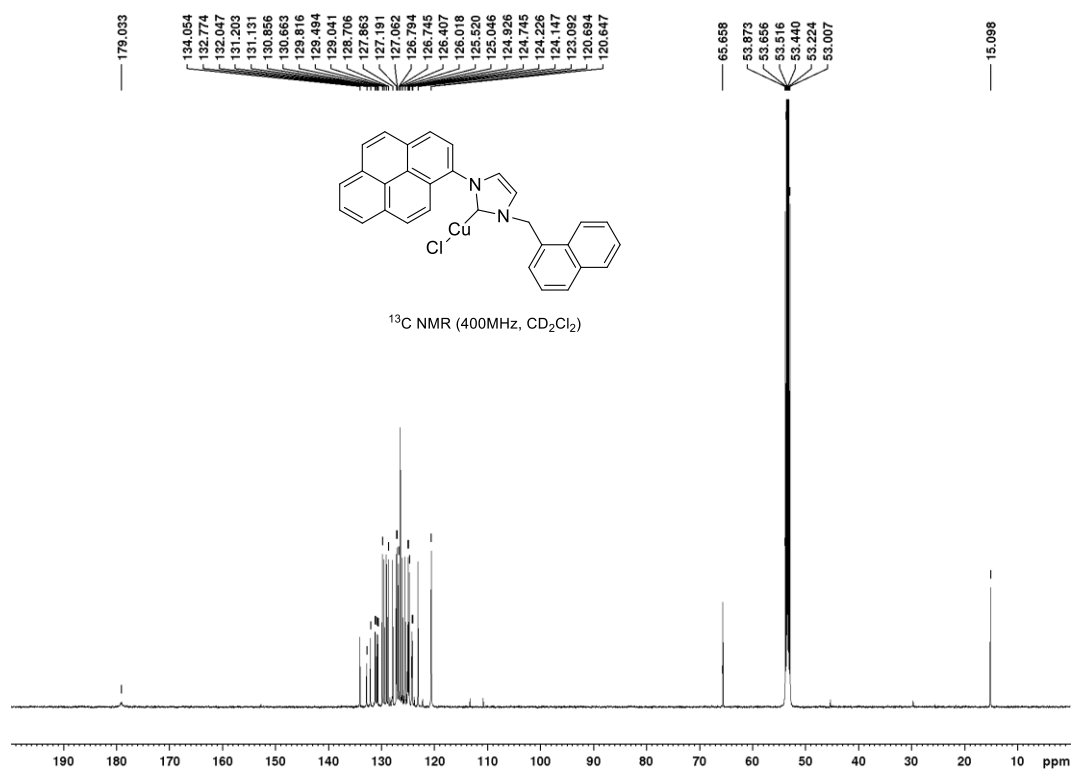

**Figure S10.** <sup>13</sup>C NMR of complex 4 in CD<sub>2</sub>Cl<sub>2</sub>

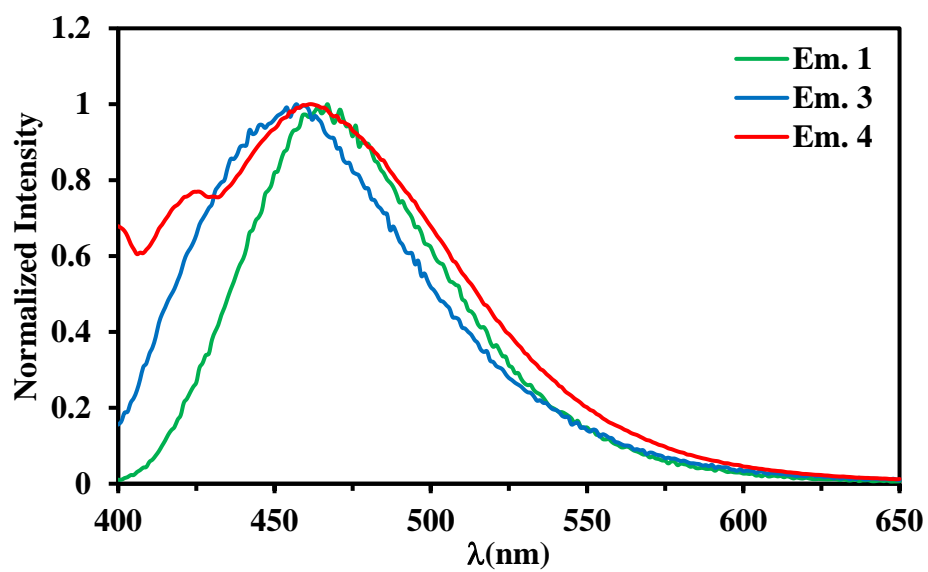

**Figure S11.** Normalized emission spectra of ligand **1** and complexes **3-4** in solid-state at rt.

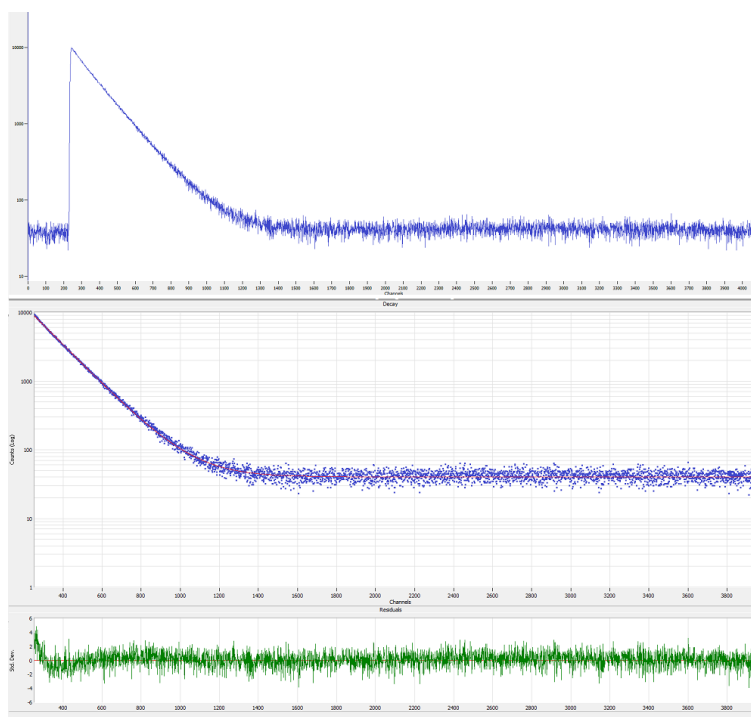

**Figure S12.** Emission decay (blue), best fit (red) and residuals (green) of **1** in  $\text{CH}_2\text{Cl}_2$  at rt;  $\chi^2 = 1.123$ .

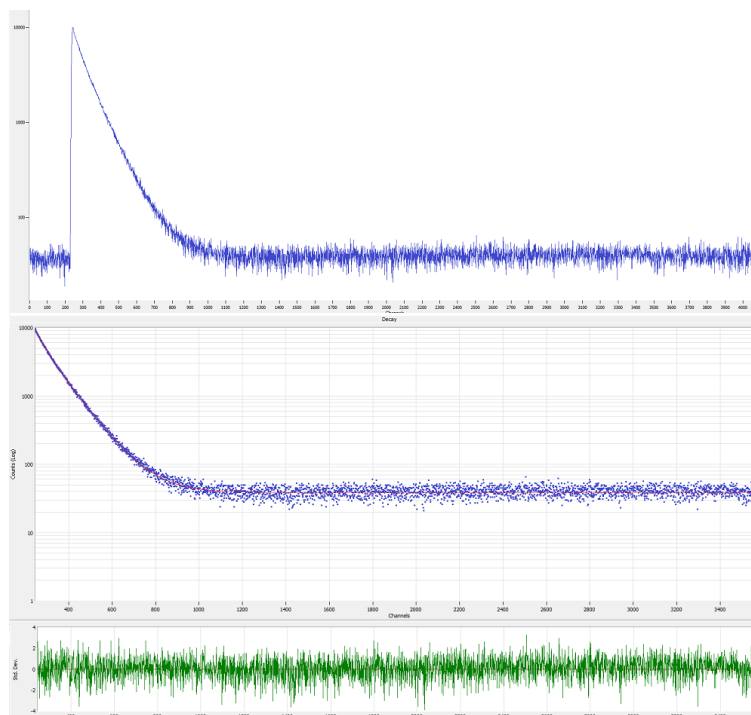

**Figure S13.** Emission decay (blue), best fit (red) and residuals (green) of **3** in CH<sub>2</sub>Cl<sub>2</sub> at rt;  $\chi^2 = 1.050$ .

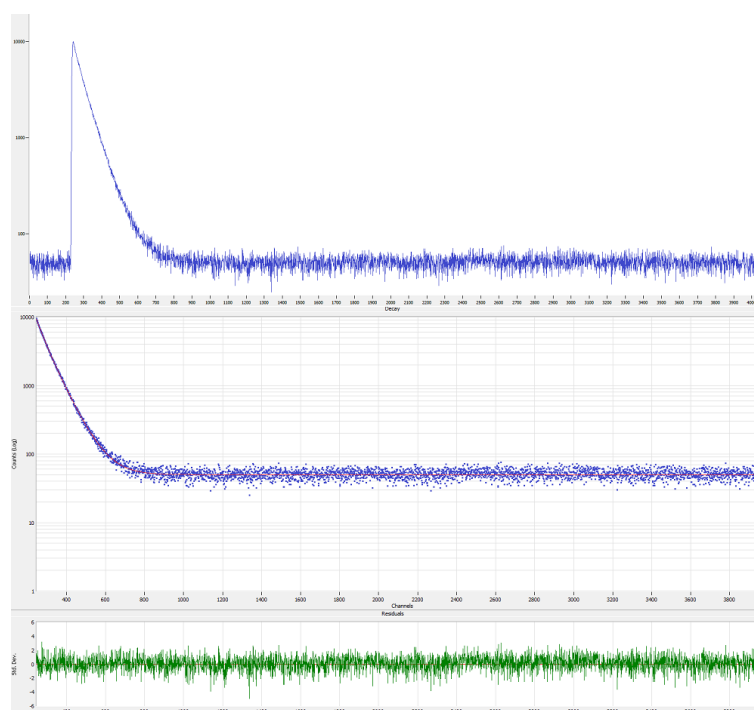

**Figure S14.** Emission decay (blue), best fit (red) and residuals (green) of **4** in CH<sub>2</sub>Cl<sub>2</sub> at rt;  $\chi^2 = 1.056$ .



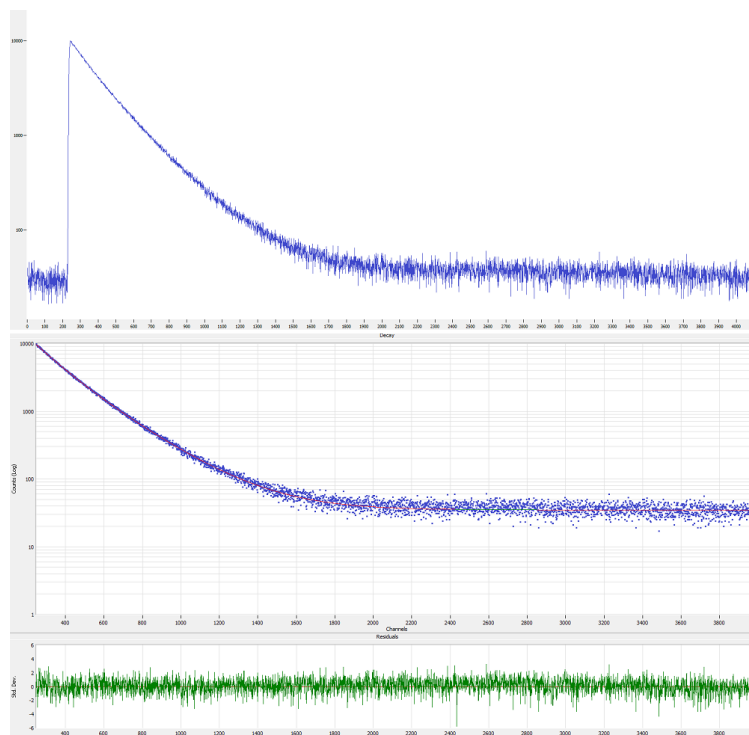

**Figure S15.** Emission decay (blue), best fit (red) and residuals (green) of **1** in solid-state at rt;  $\chi^2 = 1.084$ .

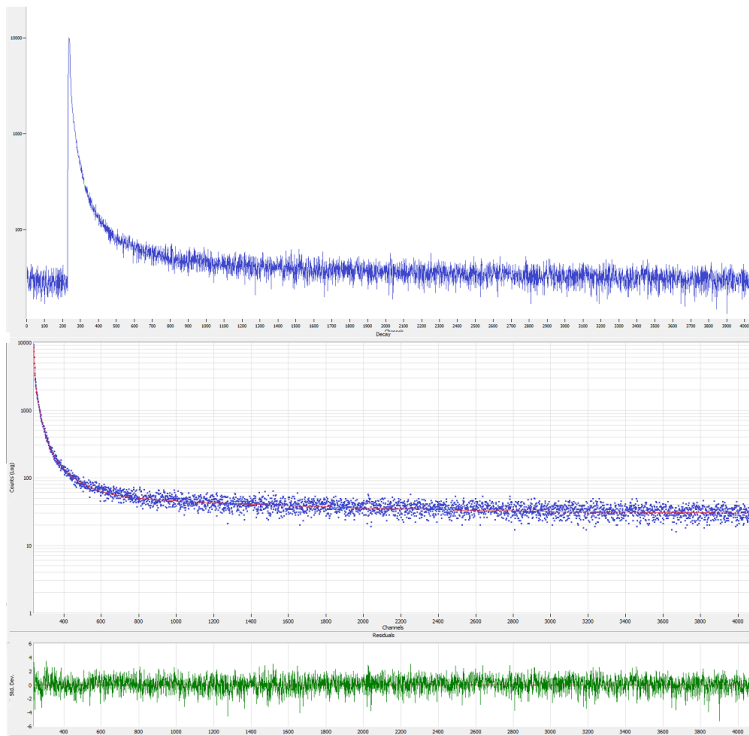

**Figure S16.** Emission decay (blue), best fit (red) and residuals (green) of **3** in solid-state at rt;  $\chi^2 = 1.061$ .

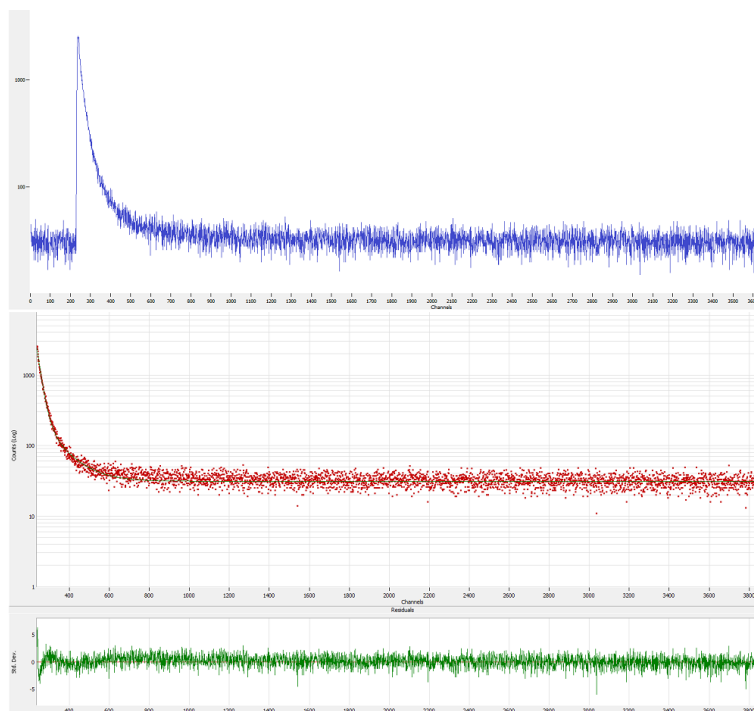

**Figure S17.** Emission decay (blue), best fit (red) and residuals (green) of **4** in solid-state at rt;  $\chi^2 = 1.150$ .
